# Supplementary material
Source: ML conference proceedings conference paper supplement (https://openaccess.thecvf.com/content/CVPR2024/html/Yuan_Density-guided_Translator_Boosts_CVPR_2024_paper.html)
Supplement: Supplementary file [file Yuan_Density-guided_Translator_Boosts_CVPR_2024_supplemental.pdf]

# Density-guided Translator Boosts Synthetic-to-Real Unsupervised Domain Adaptive Segmentation of 3D Point Clouds

## Supplementary Material

In the following sections, we first compare two versions of the noise of DGT in Sec. 1. Then, we present the hyper-parameter sensitivity analysis in Sec. 2. After that, we present the t-SNE feature visualization of different methods in Sec. 3. Finally, we show more quantitative results for a better comparison against previous methods in Sec. 4.

### 1. Noise injection in DGT

As depicted in Fig. 1(e) and Fig. 1(f), points of the real-world scan show noticeable shifts in X and Y directions, and the points in the synthetic scan are integral and clean (Fig. 1(b) and Fig. 1(c)). However, the points in the red box show no significant shifts along the Z-axis in either synthetic or real-world scans. Thus, as stated in the main body of this paper, we do not inject noise on the Z-axis and only add random noise to the X and Y axes of the synthetic scan to enhance its realism. Moreover, we use PCAN and conduct experiments with two versions of DGT, *i.e.*, inject noise on the X and Y axes (XY-noise) and inject noise on the X, Y, and Z axes (XYZ-noise). As shown in Tab. 1, in comparison with XY-noise, XYZ-noise drops mIoU by 1.4% on SynLiDAR  $\rightarrow$  SemanticKITTI (Syn  $\rightarrow$  Sk).

### 2. Parameter sensitivity

$t$ .  $t$  is a hyper-parameter to control the update frequency of the teacher model. The larger  $t$  is, the more stable the teacher model is. In this study, we use LaserMix, fix  $\alpha=0.99$ , and experiment with different  $t$  on Syn  $\rightarrow$  Sk. As shown in Tab. 2, we get the best performance when  $t=100$ . A proper choice of  $t$  is between 100 and 200.

$\alpha$ .  $\alpha$  is a hyper-parameter to control the update speed of the teacher model. A smaller  $\alpha$  would render the training unstable, and a larger  $\alpha$  would stabilize the model training but impede the student model from acquiring new target knowledge effectively. Here, we use LaserMix, fix  $t=100$ , and experiment with different  $\alpha$  on Syn  $\rightarrow$  Sk. As shown in Tab. 3, a proper choice of  $\alpha$  is between 0.99 and 0.999.

$Th_p$ .  $Th_p$  is the confidence threshold to select the pseudo labels. On the one hand, a smaller  $Th_p$  would yield many points with pseudo labels, but their accuracy cannot be guaranteed. On the other hand, a larger  $Th_p$  will filter out many incorrect pseudo-labeled points, but it is also possible to filter out correctly predicted points with smaller confidence. In this study, we experiment with different  $Th_p$  in our DGT-ST on Syn  $\rightarrow$  Sk. We present the results in Tab. 4, among which we got the best performance when

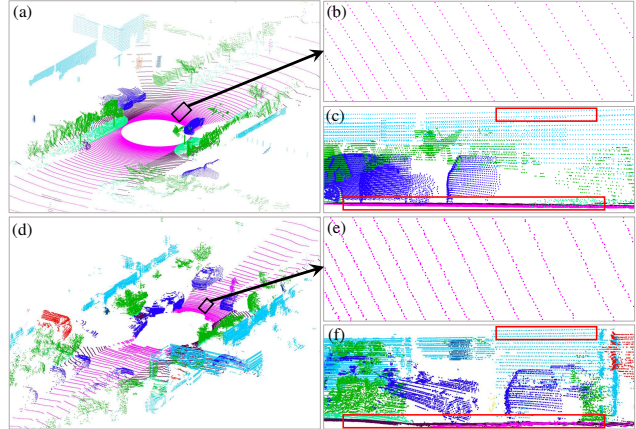

Figure 1. Comparison of synthetic and real-world scans. (a) and (d) show one scan of SynLiDAR and SemanticKITTI, respectively. (b) and (e) are zoomed-in visualizations of the road in the black box shown in (a) and (d). (c) and (f) are side-view visualizations of part of (a) and (d). The red boxes in (c) and (f) highlight that the points of synthetic and real-world scans do not exhibit significant shifts along the Z-axis.

| PCAN | DGT with XY-noise | DGT with XYZ-noise |
|------|-------------------|--------------------|
| mIoU | <b>37.0</b>       | 35.6               |

Table 1. Comparison results of injecting noise on X and Y axes (XY-noise) and injecting noise on X, Y, and Z axes (XYZ-noise) in DGT on Syn  $\rightarrow$  Sk.

| $t$  | 1    | 100         | 200  | 300  | 400  |
|------|------|-------------|------|------|------|
| mIoU | 32.7 | <b>36.0</b> | 35.9 | 35.7 | 35.3 |

Table 2. Effect of  $t$  in the mean-teacher framework on Syn  $\rightarrow$  Sk.

| $\alpha$ | 0.9  | 0.99        | 0.999 | 0.9999 |
|----------|------|-------------|-------|--------|
| mIoU     | 30.1 | <b>36.0</b> | 34.6  | 33.1   |

Table 3. Effect of  $\alpha$  in the mean-teacher framework on Syn  $\rightarrow$  Sk.

$Th_p=0.4$  and  $Th_p=0.5$ . However, for a fair comparison with CoSMix, we do not finetune this parameter and use  $Th_p=0.9$  in the main body of this paper. Moreover, the final performance of DGT-ST is not sensitive to  $Th_p$ , and a proper choice of  $Th_p$  is between 0.4 and 0.7.

| $Th_p$ | 0    | 0.1  | 0.2  | 0.3  | 0.4         | 0.5         | 0.6  | 0.7  | 0.8  | 0.9  | 0.95 |
|--------|------|------|------|------|-------------|-------------|------|------|------|------|------|
| mIoU   | 43.7 | 43.7 | 43.7 | 43.7 | <b>43.8</b> | <b>43.8</b> | 43.7 | 43.7 | 43.4 | 43.1 | 42.3 |

Table 4. Effect of confidence threshold  $Th_p$  for pseudo label selection in DGT-ST on Syn  $\rightarrow$  Sk.

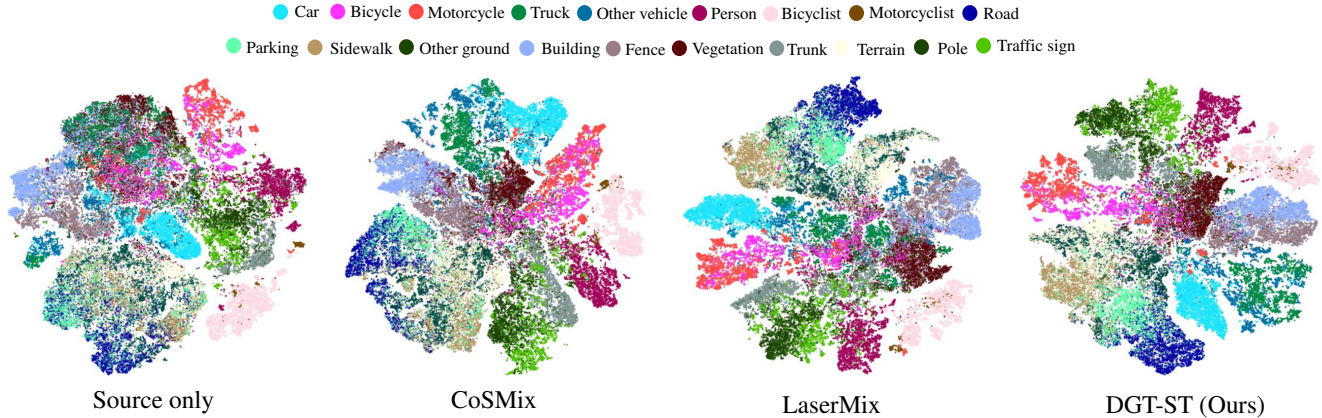

Figure 2. t-SNE visualization of the embedded features on Syn  $\rightarrow$  Sk.

### 3. t-SNE visualization

In Fig. 2, we visualize the learned features of source only, CoSMix, LaserMix, and our DGT-ST by t-SNE [1]. We can observe that semantically similar categories are mixed together for all methods, *e.g.*, the features of road, sidewalk, and parking are mixed, and features of pole and traffic sign are mixed. In comparison, we can more easily separate different classes features of DGT-ST, *e.g.*, the trunk and other classes, the pole and traffic sign classes, and the building and fence classes. Therefore, we can conclude that DGT-ST extracts more discriminative features than the other works.

### 4. More qualitative results

In Fig. 3, we present more visualization results (error maps) on Syn  $\rightarrow$  Sk, and compare our results with source only, PMAN, CoSMix, and the ground truth. Obviously, the incorrect predictions of DGT-ST are significantly fewer than other methods.

### References

- [1] Laurens Van der Maaten and Geoffrey Hinton. Visualizing data using t-SNE. *J. Mach. Learn. Res.*, 9(11), 2008. 2

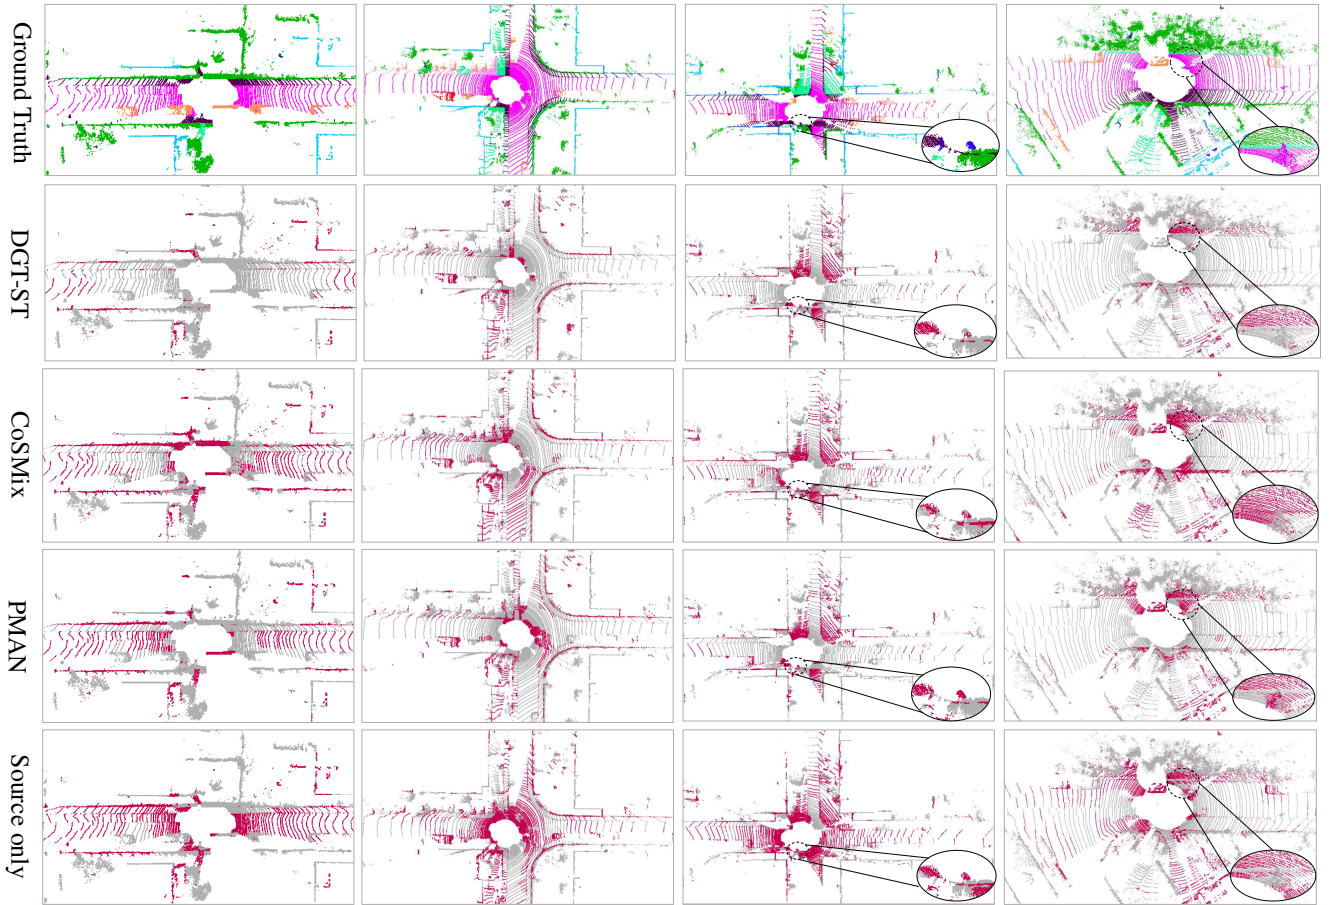

Figure 3. Additional qualitative results (error maps) on  $\text{Syn} \rightarrow \text{Sk}$ . To highlight the differences, the correct and incorrect predictions are painted in gray and red, respectively.
